# Supplementary material for: A microRNA that controls the emergence of embryonic movement
Source: eLife journal article supplement (doi:10.7554/elife.95209), 2024-03-20

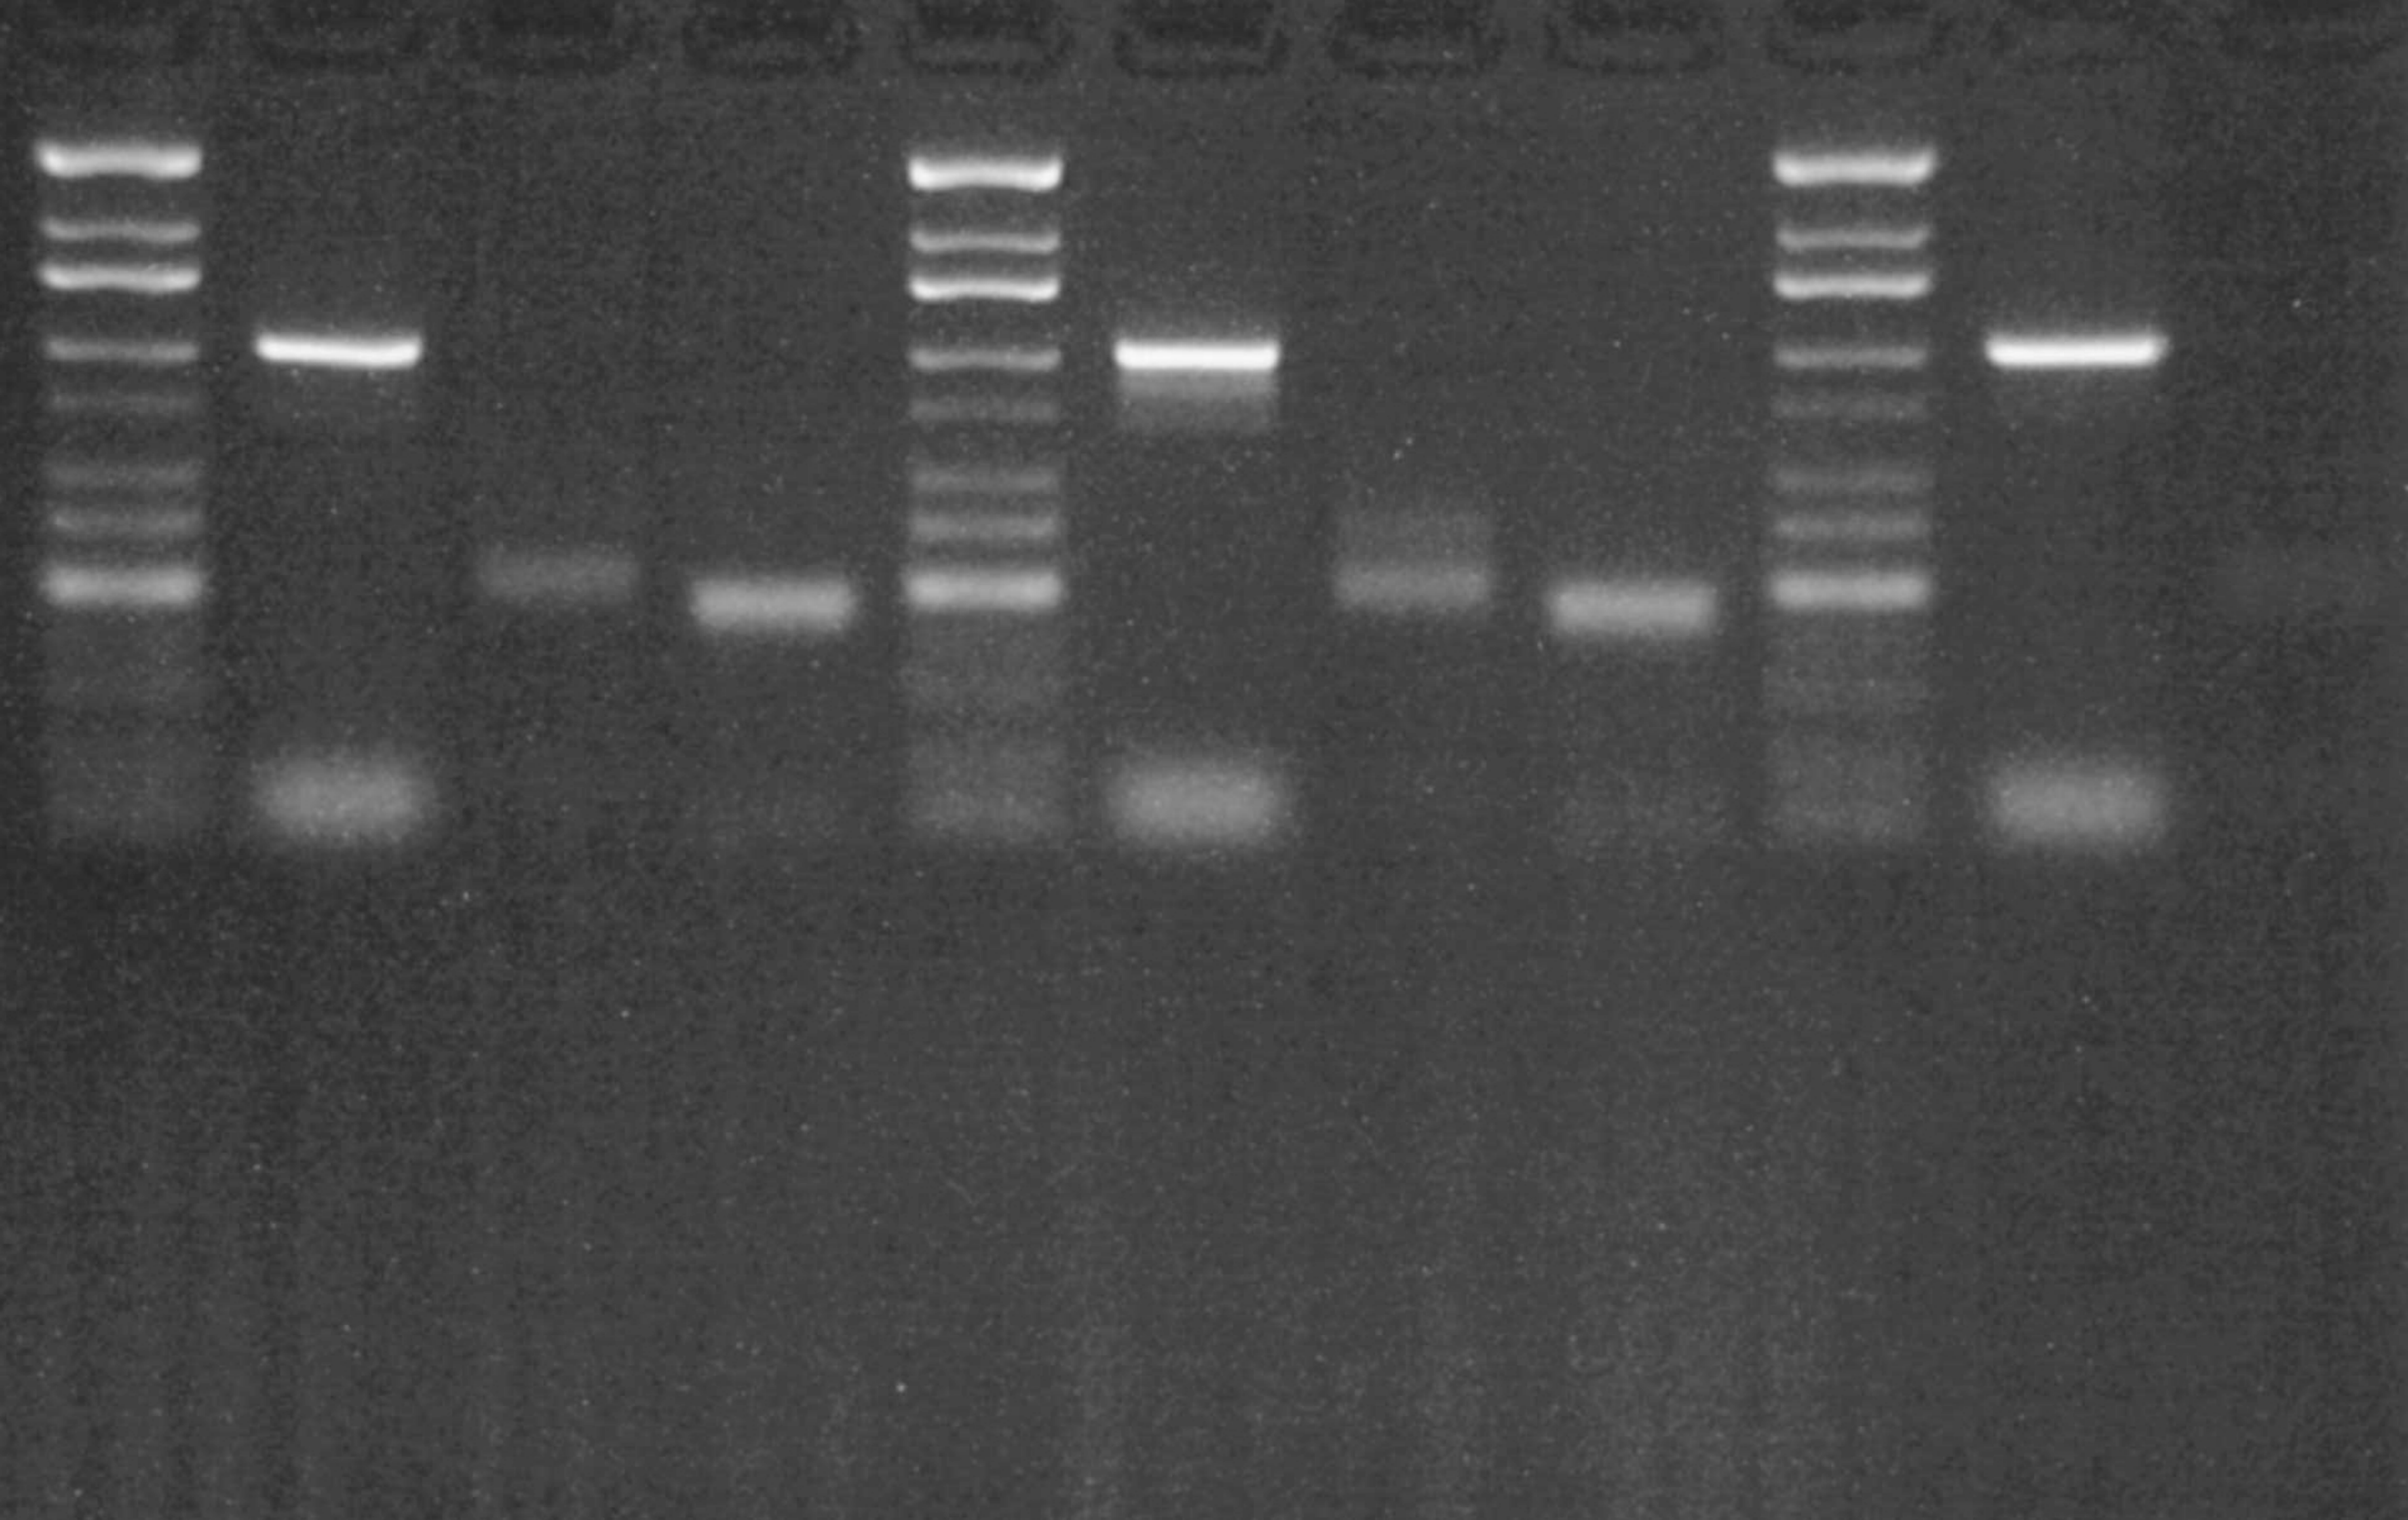

Supplement: fig3-data1 [file elife-95209-fig3-data1-v1.pdf]
