# Supplementary material for: A microRNA that controls the emergence of embryonic movement
Source: eLife. 2024 Jun 13;13:RP95209. doi: 10.7554/eLife.95209 (PMC11175612; doi:10.7554/eLife.95209)
Supplement: Figure 1—source data 1. [file elife-95209-fig1-data1.xlsx]

## Sheet: Sheet1
Larval speed w1118 vs miR-2b-1 mutants
w1118	ΔmiR-2b-1
87.0194	83.2061
74.0247	72.5402
79.0798	37.7323
79.0211	57.5522
59.6861	96.0587
77.8127	80.1832
65.6964	75.3737
81.5485	57.514
60.8128	47.5442
64.7602	76.8668
83.4962	94.2081
84.4773	63.3897
71.9656	31.5201
69.8362	39.8073
95.1114	32.0481
110.63	0
79.4188	0
83.1107	0
68.0872	29.1625
77.7861	62.3986
81.7167	63.9287
73.3911	44.2115
78.0693	34.2314
69.1571	38.7338
89.5028	0
79.3521	102.732
102.532	92.2674
89.7767	0
95.7074	0
	86.0823
	43.2431
	56.262
	57.2452
	57.187
