# Supplementary material for: A microRNA that controls the emergence of embryonic movement
Source: eLife. 2024 Jun 13;13:RP95209. doi: 10.7554/eLife.95209 (PMC11175612; doi:10.7554/eLife.95209)
Supplement: Figure 2—figure supplement 1—source data 1. [file elife-95209-fig2-figsupp1-data1.xlsx]

## Sheet: Sheet1
Embryonic movement, average movement burst duration
w1118	ΔmiR-2b-1
4.46809	3.40426
3.45745	2.5
4.92401	2.34043
3.64066	3.02601
2.97872	2.92553
3.82979	2.81915
3.45745	2.85106
3.91489	2.22222
3.02128	2.04255
4.32624	2.34043
2.79635	2.28723
3.3617	2.18085
