# Supplementary material for: A microRNA that controls the emergence of embryonic movement
Source: eLife. 2024 Jun 13;13:RP95209. doi: 10.7554/eLife.95209 (PMC11175612; doi:10.7554/eLife.95209)
Supplement: Figure 2—source data 1. [file elife-95209-fig2-data1.xlsx]

## Sheet: Sheet1
FFT +/UAS-Kir
19.701	56.6695	66.5215	44.3023	77.2565	59.5207	20.4134	37.2378	26.752
8.45712	29.0321	52.5093	55.3921	41.7939	57.6567	29.5753	25.4659	28.7842
6.32095	22.9219	22.5379	37.8776	38.8027	54.1579	28.1295	60.3489	83.6135
3.65858	11.3446	27.1158	54.7134	80.585	81.7962	98.9535	124.6	105.063
4.14964	9.10906	17.99	34.748	68.71	81.282	150.843	126.899	81.3849
4.66164	9.05618	11.5938	37.8583	74.5953	116.109	131.085	79.5761	37.455
3.57366	7.38128	13.7938	21.909	70.3006	73.2547	85.503	88.4445	53.7081
2.10421	6.4557	15.1166	30.6003	22.0601	35.8729	46.2536	48.2931	33.0059
4.1927	9.32634	15.3859	31.5368	53.355	77.8585	45.5309	45.0547	47.6818
2.783	11.0071	20.8056	48.582	60.4368	34.8668	41.8675	29.7646	18.8831
4.1995	11.1492	34.8371	55.8451	73.4879	61.5659	36.9647	34.7178	31.8595
3.91838	4.55422	19.0395	34.0065	87.2761	44.1293	41.3712	37.5747	24.4077
6.53391	13.1293	25.7695	35.3438	27.5277	34.6257	32.9761	19.1172	15.9739
