# Supplementary material for: A microRNA that controls the emergence of embryonic movement
Source: eLife. 2024 Jun 13;13:RP95209. doi: 10.7554/eLife.95209 (PMC11175612; doi:10.7554/eLife.95209)
Supplement: Figure 2—source data 2. [file elife-95209-fig2-data2.xlsx]

## Sheet: Sheet1
FFT elav-Gal4>UAS-Kir
25.6945	44.1126	87.1843	53.6762	43.0849	29.2218	14.1824	6.61244	2.27487
15.9935	15.4725	51.8762	37.9211	18.9564	19.1684	5.8975	3.38932	2.04779
8.86084	18.0627	12.7605	8.74498	9.72782	6.63116	2.56822	1.59248	0.806847
3.93969	10.5902	20.5471	7.68653	10.0457	4.34428	3.19654	1.11253	1.2221
3.53416	9.0433	9.078	11.712	6.57432	6.33417	1.78736	0.958256	0.696644
5.88329	8.05601	6.83132	4.41862	7.63962	5.80408	1.56667	0.73512	0.460541
2.20851	6.95591	8.40778	7.91068	4.32616	3.81756	1.06443	0.974133	0.687869
1.83196	5.98099	9.36375	5.98961	5.26107	4.48285	1.57647	0.64217	0.39066
2.23632	4.64711	5.98778	9.26669	11.4166	2.42173	1.33744	0.501869	0.385416
2.47802	4.76161	8.51539	11.2247	11.1082	2.07951	0.79368	0.598174	0.594545
1.18555	2.22808	5.99724	6.20777	4.62835	1.7292	0.95695	0.528985	0.230878
2.75195	3.51304	10.4174	7.90779	2.77049	1.91232	0.816748	0.619302	0.545164
2.74045	6.15804	6.79918	3.90326	2.73403	1.82616	0.793225	0.387351	0.597355
