# Supplementary material for: A microRNA that controls the emergence of embryonic movement
Source: eLife. 2024 Jun 13;13:RP95209. doi: 10.7554/eLife.95209 (PMC11175612; doi:10.7554/eLife.95209)
Supplement: Figure 2—source data 3. [file elife-95209-fig2-data3.xlsx]

## Sheet: Sheet1
Embryonic movement +/UAS-Kir vs elav-Gal4>UAS-Kir
Myogenic phase			Neurogenic phase
+/UAS-Kir	elav-Gal4> UAS-Kir		+/UAS-Kir	elav-Gal4> UAS-Kir
121.433	237.665		83.4312	36.7788
189.484	165.656		77.4633	3.45262
161.296	202.064		149.165	44.8308
242.851	96.8167		94.305	1.99411
84.0466	161.131		83.8517	43.8613
172.653	143.251		141.036	24.7468
232.242	23.0054		87.1024	0.714084
46.6595	26.6512		87.3679	3.20542
79.9392	150.636		150.204	0.879264
148.113	6.15426		95.6752	0.010407
176.391	190.67		172.338	9.32957
122.153	168.597		154.269	4.96858
