# Supplementary material for: A microRNA that controls the emergence of embryonic movement
Source: eLife. 2024 Jun 13;13:RP95209. doi: 10.7554/eLife.95209 (PMC11175612; doi:10.7554/eLife.95209)
Supplement: Figure 2—source data 4. [file elife-95209-fig2-data4.xlsx]

## Sheet: Sheet1
FFT w1118
6.65819	30.2481	45.7769	65.8537	40.799	65.4187	57.0314	58.6647	42.3043
4.42814	20.0247	45.6624	78.288	41.231	72.7484	108.816	172.165	81.4157
2.64746	9.30456	22.5365	74.6663	34.3731	109.222	94.0509	130.309	183.368
2.56519	10.8598	20.0046	42.8643	46.8752	84.551	130.821	111.564	94.415
1.51335	8.81764	25.1533	26.8613	31.9869	73.589	107.545	132.349	56.9305
2.19967	5.82507	14.1141	36.5581	17.1575	47.4585	55.6373	53.9354	90.0069
2.41144	6.05319	8.27502	18.6127	20.581	43.7362	30.5033	52.8812	57.9737
1.8099	6.03017	18.2314	26.6771	25.0007	28.6786	36.6248	43.0093	53.2404
0.777221	4.10902	11.9728	16.392	38.0814	31.1997	45.3058	44.7661	19.0638
1.36629	3.29936	8.50922	14.1252	27.2573	30.5624	37.5251	29.7751	37.7366
1.86305	3.31049	8.18597	23.8677	19.6335	22.97	32.3246	47.1736	29.3773
2.69403	4.53064	8.45607	13.8662	16.5368	22.4955	30.7337	28.9101	31.6152
1.23928	3.14931	8.32095	14.9921	21.0151	20.8191	18.2048	22.7953	26.9363
