# Supplementary material for: A microRNA that controls the emergence of embryonic movement
Source: eLife. 2024 Jun 13;13:RP95209. doi: 10.7554/eLife.95209 (PMC11175612; doi:10.7554/eLife.95209)
Supplement: Figure 2—source data 5. [file elife-95209-fig2-data5.xlsx]

## Sheet: Sheet1
FFT miR-2b-1 mutants
7.89629	18.127	18.0068	32.805	40.799	29.097	14.1826	8.95721	12.6921
3.50616	6.54879	17.3954	45.9225	41.231	12.7113	15.1286	7.66466	10.0578
2.51048	6.76347	22.0985	28.8947	34.3731	32.8842	31.0809	36.1517	16.9883
1.35056	8.40284	20.4539	28.405	46.8752	85.4092	92.546	59.8525	50.0762
1.35675	5.64798	9.03384	12.6483	31.9869	32.4024	56.8345	83.1473	81.1142
1.60695	2.91835	9.03991	22.4775	17.1575	32.5176	60.402	60.1799	65.7404
1.9215	4.5026	11.3964	18.5613	20.581	23.9128	35.3897	37.9903	36.2537
1.44632	6.2352	12.2109	19.1804	25.0007	37.5453	38.0289	33.0117	33.4819
1.48163	2.53638	5.62683	17.6557	38.0814	33.9414	37.4134	29.1151	25.5854
1.10258	4.431	12.0307	24.4189	27.2573	39.4594	37.6671	30.7493	32.6857
0.945089	2.81279	8.89563	15.8669	19.6335	23.4035	25.6726	29.1309	24.7238
0.727514	4.19886	9.85347	18.502	16.5368	16.3774	24.7693	27.6393	30.4871
0.94693	5.29401	8.15848	9.29297	21.0151	17.8661	25.8369	31.3139	26.7674
