# Supplementary material for: A microRNA that controls the emergence of embryonic movement
Source: eLife. 2024 Jun 13;13:RP95209. doi: 10.7554/eLife.95209 (PMC11175612; doi:10.7554/eLife.95209)
Supplement: Figure 2—source data 6. [file elife-95209-fig2-data6.xlsx]

## Sheet: Sheet1
Embryonic movement w1118 vs miR-2b-1 mutants
Myogenic phase			Neurogenic phase
Control	ΔmiR-2b-1		Control	ΔmiR-2b-1
53.0381	53.6785		120.502	46.5053
79.0199	14.5277		130.982	36.6419
89.6077	34.0378		161.658	81.5861
51.0813	23.602		120.292	32.6381
96.7601	90.4734		56.9714	63.5166
139.07	54.9653		65.071	83.9426
67.8719	19.4989		132.978	57.8829
99.0153	39.9474		216.316	44.1343
91.9236	109.719		103.388	70.3655
43.3038	32.2783		64.5874	30.1707
34.4563	79.5885		53.2508	57.0256
206.02	4.99185		160.194	53.6345
60.7918	41.1273		128.046	59.8308
187.624	37.0247		66.5343	49.1317
52.0726	69.7892		55.6574	33.1825
50.3476	56.9406		45.7244	27.6787
123.556	79.5976		81.4099	57.9022
166.966	64.5997		55.8681	43.4941
50.5712	5.72185		74.6373	31.0286
56.0299	71.0187		64.6748	32.959
115.933	102.795		81.1037	39.7792
133.609	50.4111		95.4475	37.774
106.705			68.9857
