# Supplementary material for: A microRNA that controls the emergence of embryonic movement
Source: eLife. 2024 Jun 13;13:RP95209. doi: 10.7554/eLife.95209 (PMC11175612; doi:10.7554/eLife.95209)
Supplement: Figure 3—figure supplement 1—source data 1. [file elife-95209-fig3-figsupp1-data1.xlsx]

## Sheet: Sheet1
Embryonic movement, parental control for genetic reconstitution of miR-2b-1 in all neurons
w1118	ΔmiR-2b-1	ΔmiR-2b-1, elav-Gal4
47.0344	18.5223	30.3535
58.9258	16.9065	40.9654
111.344	33.4882	37.361
114.501	48.5846	60.3862
75.7002	15.6863	47.1931
103.633	34.1508	36.3202
142.376	50.4081	29.8393
59.6107	60.2738	40.239
126.606	48.2307	66.3712
71.9481	32.7568	59.1075
120.133	65.2214	33.1582
		85.2828
		51.5155
