# Supplementary material for: A microRNA that controls the emergence of embryonic movement
Source: eLife. 2024 Jun 13;13:RP95209. doi: 10.7554/eLife.95209 (PMC11175612; doi:10.7554/eLife.95209)
Supplement: Figure 3—figure supplement 1—source data 2. [file elife-95209-fig3-figsupp1-data2.xlsx]

## Sheet: Sheet1
Embryonic movement, parental control for genetic reconstitution of miR-2b-1 in all neurons
w1118	ΔmiR-2b-1	ΔmiR-2b-1; elav-Gal4
87.0194	83.2061	21.4246
74.0247	72.5402	0
79.0798	37.7323	0
79.0211	57.5522	66.1813
59.6861	96.0587	63.3897
77.8127	80.1832	51.5793
65.6964	75.3737	53.4357
81.5485	57.514	62.0218
60.8128	47.5442	55.3099
64.7602	76.8668	56.3975
83.4962	94.2081	37.7435
84.4773	63.3897	75.1505
71.9656	31.5201	54.1598
69.8362	39.8073	46.7929
95.1114	32.0481	75.885
110.63	0	69.0698
79.4188	0	26.9187
83.1107	0	65.4627
68.0872	29.1625	55.2763
77.7861	62.3986	54.0785
81.7167	63.9287	40.9014
73.3911	44.2115	58.8603
78.0693	34.2314	69.9118
69.1571	38.7338	55.1296
89.5028	0	22.193
79.3521	102.732	34.5733
102.532	92.2674	45.0448
89.7767	0	60.7745
95.7074	0	36.4195
	86.0823	0
	43.2431	47.7253
	56.262
	57.2452
	57.187
