# Supplementary material for: A microRNA that controls the emergence of embryonic movement
Source: eLife. 2024 Jun 13;13:RP95209. doi: 10.7554/eLife.95209 (PMC11175612; doi:10.7554/eLife.95209)
Supplement: Figure 3—figure supplement 2—source data 1. [file elife-95209-fig3-figsupp2-data1.xlsx]

## Sheet: Sheet1
Larval speed, no light treatment controls
w1118	elav-Gal4/+	+/UAS-GtACR2	elav-Gal4>UAS-GtACR2
73.6986	84.5834	85.429	50.554
83.0768	93.4534	80.5622	64.2024
79.475	42.4084	71.2794	76.3626
71.5338	79.3764	72.3592	114.145
83.3168	86.722	85.6864	99.497
81.0392	68.0852	78.9252	70.6166
82.852	99.4604	72.5682	59.3254
76.381	86.4654	74.2166	75.948
72.2652	90.219	92.5208	0
86.5122	97.735	97.3394	80.258
74.0024	66.123	79.9266	103.723
73.4524	68.148	84.2722	0
91.085	86.7468	84.8296	77.361
85.7822	87.1422	81.6662	108.423
47.717	54.0568	82.2592	65.3338
74.6089	101.755	60.5184	77.3966
98.1545	111.036	58.1467	97.232
89.8287	85.7952	74.6419	100.839
66.6305	73.724	75.7435	63.0852
101.456	72.2949	82.3828	53.9942
75.3592	67.262	93.5786	103.843
89.8328	81.0065	77.6494	59.174
80.4699	85.2764	72.3798	68.851
65.6872	87.4238	88.8427	0
78.7254	92.8731	89.1803	0
79.5311	76.2989	79.1115	0
84.9378	85.9008	101.763	0
90.7244	88.1582		57.3254
108.716			84.6592
76.9707			0
99.7769			0
59.051			94.702
65.4477			0
			89.5866
			54.5254
			58.987
			92.159
			72.2936
			93.4534
			0
			0
			0
