# Supplementary material for: A microRNA that controls the emergence of embryonic movement
Source: eLife. 2024 Jun 13;13:RP95209. doi: 10.7554/eLife.95209 (PMC11175612; doi:10.7554/eLife.95209)
Supplement: Figure 3—figure supplement 2—source data 2. [file elife-95209-fig3-figsupp2-data2.xlsx]

## Sheet: Sheet1
Larval speed, experimental light treatment
w1118	elav-Gal4/+	+/UAS-GtACR2	elav-Gal4>UAS-GtACR2
69.774	96.6297	58.5211	52.8045
78.8556	49.9658	86.1112	40.8625
40.517	92.5895	57.092	72.6408
69.5261	77.4737	84.3966	72.3123
69.5658	73.2552	75.5724	61.0102
58.4273	105.893	96.9713	66.8472
75.4715	99.0718	64.8332	58.0158
108.769	105.184	61.6579	57.614
70.8241	68.1607	63.0422	82.2754
83.8427	109.407	75.837	66.8771
80.8751	80.4108	55.3309	39.5161
110.43	64.9976	70.576	59.646
88.9108	86.5584	100.603	55.5402
102.81	92.4522	85.4284	0
79.6131	86.4175	90.755	56.1849
110.508	82.1534	82.6739	0
120.858	90.596	74.6265	0
89.837	78.6008	113.164	0
82.8588	75.6929	57.6881	88.5912
84.2005	74.3084	81.4612	67.4538
92.0998	95.1815	75.9609	38.674
91.2195	94.5597	58.3136	38.4648
71.3552	89.4908	89.5246	63.9682
50.9243	69.9966		76.6526
105.825	96.827		0
100.19	84.07		0
93.7207	73.7454		44.0586
110.92	88.5262		22.9598
52.6899	77.8868		74.6594
82.7763	82.0884		57.1377
66.6738			0
72.3995			65.6285
86.9533			0
68.991			32.3198
