# Supplementary material for: A microRNA that controls the emergence of embryonic movement
Source: eLife. 2024 Jun 13;13:RP95209. doi: 10.7554/eLife.95209 (PMC11175612; doi:10.7554/eLife.95209)
Supplement: Figure 3—source data 2. [file elife-95209-fig3-data2.xlsx]

## Sheet: Sheet1
Embryo movement, genetic reconstitution of miR-2b-1 in all neurons
w1118	ΔmiR-2b-1	ΔmiR-2b-1; +/UAS-miR-2b-1	ΔmiR-2b-1; elav-Gal4/UAS-miR-2b-1
96.5431	70.7554	74.5093	106.584
132.787	63.2204	51.4056	91.4317
160.663	74.9856	29.5565	82.2378
64.7668	41.333	55.9507	90.4438
80.0029	55.4042	54.7842	101.955
73.775	95.792	67.2004	58.9644
71.9287	90.5533	82.0296	70.822
83.9276	62.3924	62.0382	81.2309
161.54	64.6572	56.7217	96.1203
123.302	51.8623	77.4146	91.0495
97.7416	32.6698	72.3784	83.6987
86.5629	52.6787	75.7806	64.6879
93.9896	36.1879	48.7358	56.9896
109.111	36.8486	46.5054	54.9953
90.1957	41.496	66.4062	67.0854
71.8128
75.1448
