# Supplementary material for: A microRNA that controls the emergence of embryonic movement
Source: eLife. 2024 Jun 13;13:RP95209. doi: 10.7554/eLife.95209 (PMC11175612; doi:10.7554/eLife.95209)
Supplement: Figure 3—source data 3. [file elife-95209-fig3-data3.xlsx]

## Sheet: Sheet1
Larval speed, genetic reconstitution of miR-2b-1 in all neurons
w1118	ΔmiR-2b-1	ΔmiR-2b-1; +/UAS-miR-2b-1	ΔmiR-2b-1; elav-Gal4/UAS-miR-2b-1
87.0194	83.2061	72.1539	76.7509
74.0247	72.5402	56.0274	104.315
79.0798	37.7323	87.414	63.4157
79.0211	57.5522	44.6244	109.806
59.6861	96.0587	45.8409	75.6196
77.8127	80.1832	62.873	87.827
65.6964	75.3737	36.1915	65.3274
81.5485	57.514	99.9519	104.661
60.8128	47.5442	81.2113	54.1429
64.7602	76.8668	56.9477	73.577
83.4962	94.2081	95.7117	57.1934
84.4773	63.3897	73.7248	110.12
71.9656	31.5201	0	76.3145
69.8362	39.8073	92.9234	79.2106
95.1114	32.0481	86.7861	96.3403
110.63	0	36.1963	103.296
79.4188	0	0	82.4564
83.1107	0	0	97.8027
68.0872	29.1625	83.7196	104.289
77.7861	62.3986	83.7805	115.428
81.7167	63.9287	105.345	108.207
73.3911	44.2115	64.7883	81.5867
78.0693	34.2314	80.1928	77.4794
69.1571	38.7338	93.1246	108.916
89.5028	0	0	68.0375
79.3521	102.732	0	73.0688
102.532	92.2674	60.2466	82.4575
89.7767	0	0	106.676
95.7074	0		49.4356
	86.0823		89.1734
	43.2431		76.3574
	56.262		104.203
	57.2452		98.0809
	57.187		92.343
