# Supplementary material for: A microRNA that controls the emergence of embryonic movement
Source: eLife. 2024 Jun 13;13:RP95209. doi: 10.7554/eLife.95209 (PMC11175612; doi:10.7554/eLife.95209)
Supplement: Figure 3—source data 4. [file elife-95209-fig3-data4.xlsx]

## Sheet: Sheet1
Quantified calcium dynamics at embryonic stage
w1118	ΔmiR-2b-1
404.811	296.94
407.38	432.697
264.157	301.579
453.182	289.192
410.196	426.949
468.048	284.378
439.354	247.134
444.505	309.427
424.112	366.349
495.24	252.679
357.269	290.594
