# Supplementary material for: A microRNA that controls the emergence of embryonic movement
Source: eLife. 2024 Jun 13;13:RP95209. doi: 10.7554/eLife.95209 (PMC11175612; doi:10.7554/eLife.95209)
Supplement: Figure 4—figure supplement 1—source data 1. [file elife-95209-fig4-figsupp1-data1.xlsx]

## Sheet: Sheet1
Larval speed, parental control for genetic reconstitution of miR-2b-1 in motor neurons
w1118	ΔmiR-2b-1	ΔmiR-2b-1; OK371-Gal4, +
72.015	42.0608	47.7562
98.4649	36.8716	35.4722
57.3673	58.8537	90.6341
64.6912	38.9523	47.3162
76.2772	49.5696	68.9544
55.7387	85.5444	53.3683
91.3705	63.8204	30.1533
59.9263	50.7494	81.9284
63.9595	30.9857	57.621
95.415	75.1315	39.9641
51.2139	33.7465	70.9696
67.5016	52.9926	72.9354
73.9948	35.3367	28.9331
85.4293	28.9825	45.1757
78.5894	69.0739	42.7996
69.3952	51.5419	34.651
83.4073	65.1254
69.3943
83.6665
103.671
