# Supplementary material for: A microRNA that controls the emergence of embryonic movement
Source: eLife. 2024 Jun 13;13:RP95209. doi: 10.7554/eLife.95209 (PMC11175612; doi:10.7554/eLife.95209)
Supplement: Figure 4—figure supplement 1—source data 2. [file elife-95209-fig4-figsupp1-data2.xlsx]

## Sheet: Sheet1
Larval speed, parental control for genetic reconstitution of miR-2b-1 in chordotonal organs
w1118	ΔmiR-2b-1	ΔmiR-2b-1; iav-Gal4, +
88.9648	40.0576	48.9819
102.766	32.8375	36.3382
89.5952	33.1374	31.5248
48.2252	23.1564	54.0673
72.5531	62.7133	73.4768
110.002	40.9937	42.0066
81.4334	32.772	28.748
80.1818	74.5356	49.2554
71.9261	49.7929	38.2937
47.9861	86.0845	70.3743
90.4026	65.1403	79.1698
81.5056	60.9646	55.8537
77.1444	62.9083	63.8668
96.8092	82.7237	59.6274
67.6211	56.5012	66.754
84.6099	48.2784	72.2277
88.7271	36.9428	48.8073
62.5189		67.3213
67.6865		57.6988
78.1718
100.09
76.92
