# Supplementary material for: A microRNA that controls the emergence of embryonic movement
Source: eLife. 2024 Jun 13;13:RP95209. doi: 10.7554/eLife.95209 (PMC11175612; doi:10.7554/eLife.95209)
Supplement: Figure 4—source data 1. [file elife-95209-fig4-data1.xlsx]

## Sheet: Sheet1
Embryo movement, RNAi knockdown of CG3638 in all neurons
w1118	ΔmiR-2b-1	ΔmiR-2b-1, elav>UAS-KK-control	ΔmiR-2b-1, elav>UAS-KK-CG3638
114.787	77.7104	98.7562	121.493
93.4079	51.9364	25.2421	49.2496
173.088	59.826	16.3744	74.9257
109.344	90.9068	35.8008	48.3762
68.7228	58.946	80.1831	36.356
65.5514	87.9969	45.3076	81.538
84.1225	90.8728	98.4437	79.8613
102.683	50.5977	56.973	57.1145
88.0197	57.672	45.9116	80.2369
83.5829	40.9889	33.4681	68.8046
66.4644	38.5135	52.455	88.9028
136.145	113.561	105.447	55.105
101.395	79.3353	69.9359	95.4524
103.72	22.3976	68.0053	60.0627
109.193	94.9172	72.6836	69.3128
97.5997	36.353	75.174	101.167
110.054	43.3915	94.551	66.9869
86.7579	48.3488	20.5695	96.6237
71.9757	57.359	57.5519	165.456
133.645	42.6601	50.0903	105.004
91.1942	75.1081	33.6139	98.7216
111.664	86.5135	49.4209	133.004
80.2806	46.2939		57.0136
99.8352	79.8073		52.0228
78.6792	84.4175		144.385
76.2998	52.0969		81.8105
82.7015	56.9447		66.0495
112.551			121.079
