# Supplementary material for: A microRNA that controls the emergence of embryonic movement
Source: eLife. 2024 Jun 13;13:RP95209. doi: 10.7554/eLife.95209 (PMC11175612; doi:10.7554/eLife.95209)
Supplement: Figure 4—source data 2. [file elife-95209-fig4-data2.xlsx]

## Sheet: Sheet1
Larval speed, genetic reconstitution of miR-2b-1 in motor neurons
w1118	ΔmiR-2b-1	ΔmiR-2b-1; OK371-Gal4, +	ΔmiR-2b-1; +, UAS-miR-2b-1	ΔmiR-2b-1; OK371-Gal4>UAS-miR-2b-1
72.015	42.0608	47.7562	52.6206	50.8803
98.4649	36.8716	35.4722	78.2282	41.2825
57.3673	58.8537	90.6341	83.0844	36.2594
64.6912	38.9523	47.3162	59.9206	84.6965
76.2772	49.5696	68.9544	69.4176	30.9857
55.7387	85.5444	53.3683	61.5807	75.1315
91.3705	63.8204	30.1533	41.6796	33.7465
59.9263	50.7494	81.9284	35.3479	52.9926
63.9595	30.9857	57.621	72.3906	35.3367
95.415	75.1315	39.9641	35.4011	28.9825
51.2139	33.7465	70.9696	78.8214	77.802
67.5016	52.9926	72.9354	15.7736	30.7838
73.9948	35.3367	28.9331	91.3753	60.782
85.4293	28.9825	45.1757	66.7933	22.6827
78.5894	69.0739	42.7996	28.5472	77.3599
69.3952	51.5419	34.651	35.3049	33.5457
83.4073	65.1254		48.099	60.8409
69.3943			87.8994
83.6665
103.671
