# Supplementary material for: A microRNA that controls the emergence of embryonic movement
Source: eLife. 2024 Jun 13;13:RP95209. doi: 10.7554/eLife.95209 (PMC11175612; doi:10.7554/eLife.95209)
Supplement: Figure 4—source data 3. [file elife-95209-fig4-data3.xlsx]

## Sheet: Sheet1
Larval speed, genetic reconstitution of miR-2b-1 in chordotonal organs
w1118	ΔmiR-2b-1	ΔmiR-2b-1; iav-Gal4, +	ΔmiR-2b-1; +, UAS-miR-2b-1	ΔmiR-2b-1; iav-Gal4>UAS-miR-2b-1
88.9648	40.0576	48.9819	101.393	65.0114
102.766	32.8375	36.3382	24.7353	68.7851
89.5952	33.1374	31.5248	41.658	42.0066
48.2252	23.1564	54.0673	64.9846	89.2832
72.5531	62.7133	73.4768	88.9143	84.6062
110.002	40.9937	42.0066	79.0999	66.2803
81.4334	32.772	28.748	86.1523	89.9021
80.1818	74.5356	49.2554	93.5432	99.9182
71.9261	49.7929	38.2937	48.6008	89.5094
47.9861	86.0845	70.3743	33.2953	106.849
90.4026	65.1403	79.1698	34.9284	115.345
81.5056	60.9646	55.8537	33.8932	86.537
77.1444	62.9083	63.8668	32.5104	97.081
96.8092	82.7237	59.6274	61.1296	93.8304
67.6211	56.5012	66.754	79.3849	72.5691
84.6099	48.2784	72.2277	39.4644	64.2063
88.7271	36.9428	48.8073
62.5189		67.3213
67.6865		57.6988
78.1718
100.09
76.92
