# Supplementary material for: A microRNA that controls the emergence of embryonic movement
Source: eLife. 2024 Jun 13;13:RP95209. doi: 10.7554/eLife.95209 (PMC11175612; doi:10.7554/eLife.95209)
Supplement: Figure 4—source data 5. [file elife-95209-fig4-data5.xlsx]

## Sheet: Sheet1
Larval speed, RNAi knock down of CG3638 in chordotonal organs
w1118	ΔmiR-2b-1	ΔmiR-2b-1, control-RNAi	ΔmiR-2b-1, Janus-RNAi
84.9483	33.7609	79.9019	100.409
103.602	54.9597	77.4312	52.4052
68.8101	86.3076	75.8016	77.1056
85.1915	28.3104	63.153	69.6566
49.7461	68.5654	65.0458	76.5311
81.6073	68.5133	82.1297	55.2724
78.1795	39.486	62.9346	78.653
81.3814	59.1596	55.2408	78.4907
83.3932	77.0362	54.3345	59.6241
80.7563	42.4421	63.0564	57.0409
96.3984	41.1852	50.2103	62.5605
75.0847	72.2491	35.2583	79.7726
47.3904	57.0944	41.8638	62.9556
76.61	45.7292	58.5438	67.8501
64.1773	79.2626	57.0722	97.3366
92.3346		72.3249	97.6904
80.1833		51.4988	72.9801
57.1702			86.8542
			86.5335
